# Supplementary material for: Cerebrospinal fluid chemokine patterns in children with enterovirus 71-related encephalitis
Source: PubMed Central journal article supplement (PMC5786096; doi:10.1038/s41598-018-19988-6), 2018-01-26
Supplement: 41598_2018_19988_MOESM1_ESM.pdf [file 41598_2018_19988_MOESM1_ESM.pdf]

## Cerebrospinal fluid chemokine patterns in children with enterovirus 71-related encephalitis

Jinling Liu, Shuxian Li, Chunyan Cai, Yingchun Xu, Yuan Jiang, Zhimin Chen

Table S1. Correlation between CSF chemokine concentrations (pg/ml) and CSF WBC in FC patients

| Chemokine    | WBC      |          |
|--------------|----------|----------|
|              | <i>r</i> | <i>P</i> |
| IL-8/CXCL8   | -0.03    | 0.896    |
| RANTES/CCL5  | 0.315    | 0.154    |
| MIG/CXCL9    | 0.253    | 0.256    |
| MCP-1/CCL2   | 0.227    | 0.309    |
| IP-10/CXCL10 | 0.372    | 0.088    |

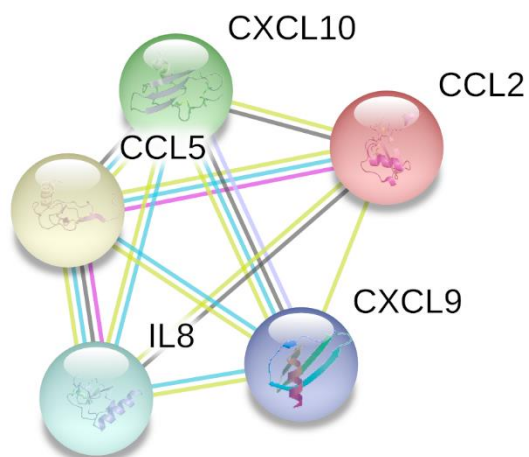

**Figure S1.** Protein interaction network analysis of the chemokines.
